# Supplementary material
Source: HighWire-hosted journal article supplement (https://srh.bmj.com/highwire/filestream/141285/field_highwire_adjunct_files/0/bmjsrh-2020-200880supp001_data_supplement.pdf)
Supplement: bmjsrh-2020-200880supp001_data_supplement.pdf [file bmjsrh-2020-200880supp001_data_supplement.pdf]

**Table of Contents**

|    |                                       |    |
|----|---------------------------------------|----|
| 30 | <b>Introduction</b> .....             | 4  |
| 31 | <b>Study Design and Methods</b> ..... | 4  |
| 32 | <b>Results</b> .....                  | 8  |
| 33 | <b>Figure S1</b> .....                | 9  |
| 34 | <b>References</b> .....               | 10 |
| 35 |                                       |    |
| 36 |                                       |    |

37 Introduction

38 The first wave of the COVID-19 pandemic posed challenges for the provision of abortion  
39 care in Europe. Reallocation of resources, redeployment of staff, and social distancing  
40 requirements all introduced new barriers to in-person clinic visits.<sup>1,2</sup>

41 Countries differed in their policy responses to these new challenges. Great Britain expanded  
42 remote access to medication abortion, allowing teleconsultation with providers, and  
43 mifepristone and misoprostol to be provided by mail.<sup>3-5</sup> France extended the ability to take  
44 abortion medications at home following an in-person visit with a healthcare professional  
45 from 7 weeks to 9 weeks of gestation.<sup>6</sup> Germany allowed mandatory pre-abortion  
46 counselling to take place by phone or video teleconsult instead of in person.<sup>7</sup> Most other  
47 countries, however, made few changes to medication abortion service models and continued  
48 to require fully in-person provision, despite calls from human rights groups to prioritize  
49 patient safety and expand remote access.<sup>7,8</sup>

50 We assessed whether demand for online medication abortion changed significantly in eight  
51 countries after implementation of stay-at-home orders intended to reduce the spread of  
52 COVID-19 in Europe, using online medication abortion request data from Women on Web,  
53 a non-profit organisation that provides telemedicine medication abortion services up to 10  
54 weeks of gestation.<sup>9</sup>

55 Study Design and Methods

56 We examined data from Women on Web, a non-profit organization that provides medical  
57 abortion services in Europe up to 10 weeks' gestation via online telemedicine.<sup>9</sup> We obtained  
58 the daily number of requests from eight countries between January 1<sup>st</sup>, 2019 and June 1<sup>st</sup>,

59 2020 (the last day that lockdown measures were lifted in a country included in the analysis).  
60 Our analytic sample includes eight countries: Germany, Hungary, Italy, Malta, The  
61 Netherlands, Northern Ireland, Portugal, and Great Britain. WoW does not accept  
62 consultations from all countries in Europe, because abortion is legal and normally relatively  
63 accessible in most places. Among those countries that WoW does serve, some have only a  
64 few consultations requests over the course of a year. We excluded countries that had too few  
65 requests to reliably detect differences in request numbers between the ‘before’ and ‘after’  
66 periods (i.e. fewer than 10 expected requests in the ‘after’ period). We also excluded Spain,  
67 because the Spanish Government censored the WoW website during the study period and so  
68 no requests could be made,<sup>10</sup> and Poland because the number of requests made to WoW has  
69 been unstable since the beginning of 2020.

70 We analyzed trends in these requests using a regression-discontinuity design, [using a](#)  
71 [likelihood-ratio test to compare count models](#).<sup>11,12</sup> For each country, we include data from 1<sup>st</sup>  
72 January 2019 to the date that lockdown measures were lifted in each country. We  
73 designated a ‘before’ period, which began on 1<sup>st</sup> January 2019 and ended on the date that  
74 each individual country’s government issued their first ‘stay-at-home’ directive. The one  
75 exception was Germany, where the ‘before’ period begins on 1<sup>st</sup> January 2020, due to the  
76 fact that WoW did not accept consultations from Germany in until late 2019. The ‘after’  
77 period began the first day after the ‘stay-at-home’ directive was issued for each country, and  
78 ended on the first day that the directives were eased in each country. We incorporate a  
79 discontinuity for each country for the dates on which stay-at-home orders were in place. To  
80 allow sufficient power to detect differences, our analysis included only countries that had at  
81 least 10 total expected requests in the “before” period based on baseline trends. As only

82 Malta did not issue a population-wide directive, we instead used the date that the Maltese  
83 government issued a directive to close public places as the discontinuity point.<sup>13</sup> [Women on](#)  
84 [Web has accepted consultations from Northern Ireland and Malta since 2006, Hungary since](#)  
85 [2013, Great Britain since 2016, Italy since 2018, and Germany, the Netherlands, and](#)  
86 [Portugal since 2019.](#)

87 Our aim was to test whether the rate of Women on Web requests significantly changed in  
88 the “after” period. We fit separate generalized linear models (GLMs) to each country’s daily  
89 requests from the beginning of the “before” period until the date stay-at-home measures  
90 were lifted. Each country’s model incorporated a dummy variable taking the value of 1 for  
91 days in the “after” period, where the stay-at-home order was in place. For Northern Ireland,  
92 both the null and discontinuity models included a dummy variable indicating the period after  
93 11<sup>th</sup> April 2020, when Northern Ireland’s service model changed due to legalization of  
94 abortion.<sup>14</sup>

95 To determine the functional form of each country’s GLM, we first fit a Poisson model with  
96 a log link and assessed goodness of fit using a chi-squared test. For any countries with a poor  
97 Poisson model fit ( $p < 0.05$ ), we refit a Negative Binomial GLM to account for over-  
98 dispersion and reassessed fit. This resulted in well-fitting models ( $p \geq 0.05$ ) for all countries.

99 For a single country, our Poisson GLM can be formalized as

$$100 \quad \log(\text{cases}_t) = t + x_t + \epsilon_t, \quad \epsilon_t \sim N(0, \sigma^2) \quad (1)$$

101 while the corresponding null model is written as

$$102 \quad \log(\text{cases}_t) = t + \epsilon_t, \quad \epsilon_t \sim N(0, \sigma^2) \quad (2)$$

103 where  $t$  represents days,  $cases_t$  is the number of Women on Web requests on day  $t$ , and  
104 and  $x_t$  takes values of 0 or 1, depending on whether stay-at-home restrictions for that  
105 country are in place on day  $t$ .

106

107 We include an additional term in the models for Northern Ireland due to the change in  
108 abortion legalization. The Poisson GLM model for Northern Ireland can be formalized as

$$109 \quad \log(cases_t) = t + x_t + z_t + \epsilon_t, \quad \epsilon_t \sim N(0, \sigma^2) \quad (3)$$

110 where  $z_t$  takes values of 0 or 1, depending on whether day  $t$  falls before 11<sup>th</sup> April, 2020.

111 The corresponding null model is

$$112 \quad \log(cases_t) = t + z_t + \epsilon_t, \quad \epsilon_t \sim N(0, \sigma^2). \quad (4)$$

113 [We also compiled information for each country included in the analysis on several metrics](#)  
114 [we hypothesised could be related to demand for online abortion: stringency of ‘stay-at-](#)  
115 [home’ requirements; deaths due to COVID-19; economic assistance provided by](#)  
116 [governments in response to the pandemic; and abortion service provision before and during](#)  
117 [the pandemic. These metrics were defined by and obtained from the Oxford COVID-19](#)  
118 [Government Response Tracker \(OxCGRT\). The stringency of ‘stay-at-home’ requirements](#)  
119 [is expressed as a normalised ordinal score resulting in an index \(0-100\) that reflects the](#)  
120 [stringency of lockdown on any given day. We selected the highest daily score for each](#)  
121 [country within the study period. Deaths due to COVID-19 were defined as the cumulative](#)  
122 [total of COVID-19 deaths reported by each country on the first day during the study period](#)  
123 [when the stringency of ‘stay-at-home’ index fell. The number of deaths reported is](#)  
124 [dependent on how each country defines COVID-19 deaths. Economic assistance provided](#)  
125 [by governments is based on the maximum level of the normalised economic support index,](#)  
126 [based on both the level of income support and household debt/contract relief provided by](#)  
127 [the government of each country. We selected the highest daily score for each country within](#)  
128 [the study period. We examined each of these metrics across each country included in the](#)  
129 [analysis to assess their relationship to changes in requests to WoW.](#)

## 130 Results

131 We refer readers to Figure 1 and Table 1 in the main paper for presentation of our main  
132 results. Here, we provide a supplementary figure to illustrate our methods. Figure S1 lends  
133 intuition to the regression discontinuity model for a single country, and illustrates Hungary’s  
134 significant increase in cumulative WoW requests after implementation of the stay-at-home  
135 request, compared to the expected number requests under the null model.



136

137 Figure S1

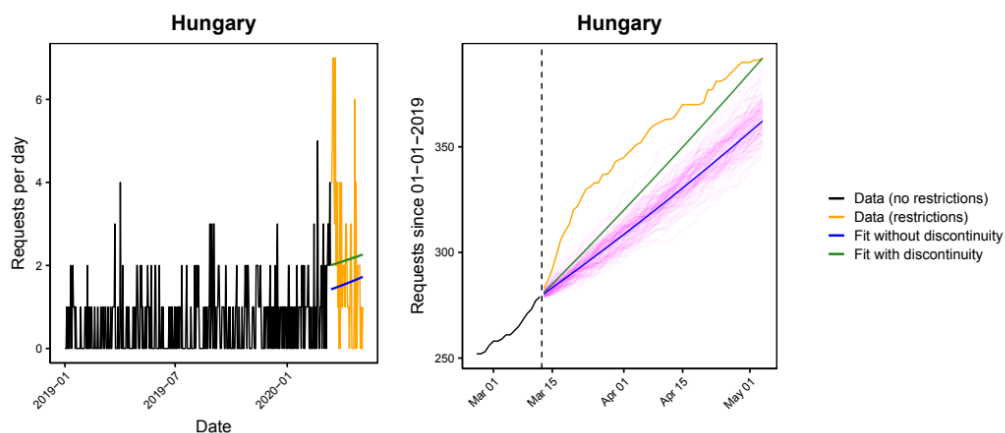

138 Left panel: The daily number of requests for Hungary since January 1, 2019. Requests on  
139 dates without stay-at-home restrictions are black; requests on dates with restrictions are  
140 orange. The blue line shows the model fit without discontinuities (the null model), and the  
141 green line shows the model fit with the stay-at-home discontinuity. Right panel: The same  
142 data, shown in terms of cumulative requests since 1<sup>st</sup> January, 2019. The pink lines are 250  
143 Monte Carlo simulations from the null model. These corroborate the likelihood-ratio test  
144 and suggest the observed rate of requests in Hungary is inconsistent with the null model.  
145 The model with a discontinuity fits the data well, as measured by a chi-squared goodness-of-  
146 fit test ( $p > 0.05$ ).

147

## 148 References

149

150 1. Council on Foreign Relations. Women Around the World &amp; Women and Foreign Policy

151 Program. Abortion in the Time of COVID-19. June 25<sup>th</sup> 2020.152 <https://www.cfr.org/blog/abortion-time-covid-19> (Accessed September 4th 2020).

153

154 2. European Parliamentary Forum for Sexual and Reproductive Rights &amp; International

155 Planned Parenthood Federation Report. April 22<sup>nd</sup> 2020. Women and girls left without care:156 a snapshot in time during COVID-19. <https://www.epfweb.org/sites/default/files/2020->157 [05/epf\\_-\\_ipff\\_en\\_joint\\_report\\_sexual\\_and\\_reproductive\\_health\\_during\\_the\\_covid-](https://www.epfweb.org/sites/default/files/2020-05/epf_-_ipff_en_joint_report_sexual_and_reproductive_health_during_the_covid-19_pandemic_23.04.2020.pdf)158 [19\\_pandemic\\_23.04.2020.pdf](https://www.epfweb.org/sites/default/files/2020-05/epf_-_ipff_en_joint_report_sexual_and_reproductive_health_during_the_covid-19_pandemic_23.04.2020.pdf) (Accessed September 4th 2020).

159

160 3. Department of Health and Social Care. Temporary approval of home use for both stages

161 of early medical abortion in England. March 30<sup>th</sup> 2020.162 <https://www.gov.uk/government/publications/temporary-approval-of-home-use-for-both->163 [stages-of-early-medical-abortion--2](https://www.gov.uk/government/publications/temporary-approval-of-home-use-for-both-stages-of-early-medical-abortion--2) (Accessed September 4th 2020).

164

165 4. Department of Health and Social Services. Temporary approval of home use for both

166 stages of early medical abortion in Wales.

167 April 1<sup>st</sup> 2020. <https://gov.wales/temporary-approval-home-use-both-stages-early-medical->168 [abortion](https://gov.wales/temporary-approval-home-use-both-stages-early-medical-abortion)169 (Accessed September 4<sup>th</sup> 2002).

170

- 171 5. Scottish Government Chief Medical Officer Directorate. Temporary approval of home  
172 use for both stages of early medical abortion in Scotland. March 31<sup>st</sup> 2020.  
173 [https://www.sehd.scot.nhs.uk/cmo/CMO\(2020\)09.pdf](https://www.sehd.scot.nhs.uk/cmo/CMO(2020)09.pdf) (Accessed September 4th 2020).  
174
- 175 6. Haute Autorité de Santé. Réponses rapides dans le cadre du COVID-19 - Interruption  
176 Volontaire de Grossesse (IVG) médicamenteuse à la 8ème et à la 9ème semaine  
177 d'aménorrhée (SA) hors milieu hospitalier  
178 9<sup>th</sup> April 2020. [https://www.has-sante.fr/upload/docs/application/pdf/2020-  
179 04/reponse\\_rapide\\_ivg\\_09\\_04\\_2020\\_coiv8.pdf](https://www.has-sante.fr/upload/docs/application/pdf/2020-04/reponse_rapide_ivg_09_04_2020_coiv8.pdf) (Accessed September 4th 2020).  
180
- 181 7. Webber M. How coronavirus is changing access to abortion. *Politico*. May 8<sup>th</sup> 2020.  
182 [https://www.politico.eu/article/how-coronavirus-is-changing-access-to-reproductive-  
183 health/](https://www.politico.eu/article/how-coronavirus-is-changing-access-to-reproductive-health/)  
184 (Accessed September 4th 2020).  
185
- 186 8. Center for Reproductive Rights. European governments must ensure safe and timely  
187 access to abortion care during the COVID-19 pandemic.  
188 [https://reproductiverights.org/press-room/european-governments-must-ensure-safe-and-  
189 timely-access-abortion-care-during-covid-19](https://reproductiverights.org/press-room/european-governments-must-ensure-safe-and-timely-access-abortion-care-during-covid-19) (Accessed September 4th 2020).  
190
- 191 9. Women on Web <https://www.womenonweb.org/en/page/521/about-women-on-web>  
192 (Accessed September 4th 2020).  
193
- 194 10. Women on Web. Spain censors information about abortion amid Covid-19 lockdown.

195 June 17<sup>th</sup> 2020. [https://www.womenonweb.org/en/page/20230/spain-censors-information-](https://www.womenonweb.org/en/page/20230/spain-censors-information-about-abortion-amid-covid-19-lockdown)  
196 [about-abortion-amid-covid-19-lockdown](https://www.womenonweb.org/en/page/20230/spain-censors-information-about-abortion-amid-covid-19-lockdown). (Accessed September 4th 2020).

197

198 11. Venkataramani AS, Bor J, Jena AB. Regression discontinuity designs in healthcare  
199 research. *BMJ*. 2016 Mar 14;352:i1216.

200

201 12. [Cameron, A. C. and Trivedi, P. K. \(2013\). Regression analysis of count data, volume 53.](#)  
202 [Cambridge university press.](#)

203

204 13. Azzopardi K. Covid-19 regulations repealed, vulnerable people no longer required to stay  
205 at home. *Malta Independent*. June 4<sup>th</sup> 2020. [https://www.independent.com.mt/articles/2020-](https://www.independent.com.mt/articles/2020-06-04/local-news/Covid-19-regulations-repealed-vulnerable-people-no-longer-required-to-stay-at-home-6736223847)  
206 [06-04/local-news/Covid-19-regulations-repealed-vulnerable-people-no-longer-required-to-](https://www.independent.com.mt/articles/2020-06-04/local-news/Covid-19-regulations-repealed-vulnerable-people-no-longer-required-to-stay-at-home-6736223847)  
207 [stay-at-home-6736223847](https://www.independent.com.mt/articles/2020-06-04/local-news/Covid-19-regulations-repealed-vulnerable-people-no-longer-required-to-stay-at-home-6736223847) (Accessed September 4th 2020).

208

209 14. Ferguson A. Northern Ireland authorities give green light to abortion services. *Reuters*.  
210 April 9<sup>th</sup> 2020. [https://www.reuters.com/article/us-britain-nireland-abortion/northern-](https://www.reuters.com/article/us-britain-nireland-abortion/northern-ireland-authorities-give-green-light-to-abortion-services-idUSKCN21R2XG)  
211 [ireland-authorities-give-green-light-to-abortion-services-idUSKCN21R2XG](https://www.reuters.com/article/us-britain-nireland-abortion/northern-ireland-authorities-give-green-light-to-abortion-services-idUSKCN21R2XG) (Accessed  
212 September 4th 2020).
